# Supplementary material for: Construction and comparison of gene co-expression networks shows complex plant immune responses
Source: PubMed Central journal article supplement (PMC4194462; doi:10.7717/peerj.610), 2014-10-09
Supplement: peerj-02-610-s002.pdf [file peerj-02-610-s002.pdf]

**Table S1.** The main results for S-GCNs construction: The expression matrices dimensions, similarity thresholds, characterization variables and clusters where S-GCNs were grouped\*.

| id. | Plant       | Sam | Gen   | $\tau^*$ | Nod   | Edg     | CC    | Cen   | Het   | Den       | AsG        | AsP        | Tol  | KI     | Clu |
|-----|-------------|-----|-------|----------|-------|---------|-------|-------|-------|-----------|------------|------------|------|--------|-----|
| 1   | Arabidopsis | 4   | 4,224 | 0.83     | 112   | 908     | 0.707 | 0.586 | 0.810 | 7.304E-02 | -8.106E-03 | -1.330E-02 | 0.07 | 0.124  | 2   |
| 2   | Arabidopsis | 12  | 4,224 | 0.43     | 852   | 10,656  | 0.637 | 0.229 | 1.522 | 1.470E-02 | 2.532E-03  | -3.354E-03 | 0.35 | 0.083  | 6   |
| 3   | Arabidopsis | 56  | 4,224 | 0.57     | 1,439 | 513,484 | 0.998 | 0.554 | 0.591 | 2.481E-01 | -8.769E-04 | -9.387E-04 | 0.00 | 0.022  | 4   |
| 4   | Arabidopsis | 5   | 4,224 | 0.46     | 378   | 731     | 0.880 | 0.198 | 1.656 | 5.130E-03 | -9.874E-03 | -3.622E-03 | 0.01 | -0.065 | 7   |
| 5   | Arabidopsis | 16  | 4,224 | 0.29     | 1,400 | 161,715 | 0.985 | 0.806 | 0.687 | 8.257E-02 | 8.321E-04  | -4.682E-04 | 0.01 | -0.028 | 8   |
| 6   | Arabidopsis | 6   | 4,224 | 0.30     | 1,554 | 188,162 | 0.957 | 0.735 | 0.946 | 7.797E-02 | -1.563E-03 | -1.218E-03 | 0.03 | 0.040  | 8   |
| 7   | Arabidopsis | 6   | 4,224 | 0.28     | 522   | 35,473  | 0.898 | 0.366 | 0.614 | 1.304E-01 | -1.954E-03 | -2.596E-03 | 0.20 | -0.059 | 9   |
| 8   | Arabidopsis | 6   | 4,224 | 0.30     | 1,688 | 244,171 | 0.963 | 0.741 | 0.880 | 8.574E-02 | -6.399E-05 | -7.590E-04 | 0.05 | 0.028  | 8   |
| 9   | Arabidopsis | 6   | 4,224 | 0.52     | 338   | 6,969   | 0.998 | 0.198 | 0.745 | 6.118E-02 | -5.344E-03 | -4.107E-03 | 0.87 | 0.044  | 1   |
| 10  | Arabidopsis | 6   | 4,224 | 0.40     | 920   | 9,945   | 0.649 | 0.271 | 1.597 | 1.176E-02 | 1.705E-03  | -2.205E-03 | 0.23 | 0.044  | 6   |
| 11  | Arabidopsis | 27  | 4,224 | 0.86     | 324   | 2,811   | 0.858 | 0.334 | 1.154 | 2.686E-02 | -5.751E-03 | -2.855E-03 | 0.07 | -0.016 | 7   |
| 12  | Arabidopsis | 8   | 4,224 | 0.69     | 535   | 4,852   | 0.915 | 0.214 | 1.291 | 1.698E-02 | 1.453E-03  | -4.289E-03 | 0.17 | -0.055 | 7   |
| 13  | Arabidopsis | 12  | 4,224 | 0.62     | 1,508 | 51,101  | 0.830 | 0.277 | 1.275 | 2.249E-02 | 1.237E-02  | -5.382E-04 | 0.38 | 0.020  | 6   |
| 14  | Arabidopsis | 24  | 4,224 | 0.90     | 215   | 1,911   | 0.799 | 0.571 | 1.172 | 4.153E-02 | -9.556E-03 | -1.142E-02 | 0.23 | -0.020 | 2   |
| 15  | Arabidopsis | 32  | 4,224 | 0.69     | 437   | 13,954  | 0.987 | 0.226 | 0.747 | 7.324E-02 | -5.009E-03 | -3.227E-03 | 0.29 | -0.038 | 7   |
| 16  | Arabidopsis | 6   | 4,224 | 0.89     | 352   | 1,310   | 0.901 | 0.156 | 1.158 | 1.060E-02 | 1.638E-02  | -3.495E-03 | 0.05 | -0.008 | 5   |
| 17  | Arabidopsis | 12  | 4,224 | 0.45     | 1,043 | 18,383  | 0.953 | 0.376 | 1.548 | 1.691E-02 | 3.423E-03  | -3.135E-03 | 0.17 | 0.091  | 6   |
| 18  | Arabidopsis | 16  | 4,224 | 0.28     | 708   | 95,194  | 0.990 | 0.589 | 0.368 | 1.902E-01 | 5.429E-05  | -1.361E-03 | 0.00 | -0.002 | 9   |
| 19  | Arabidopsis | 6   | 4,224 | 0.43     | 684   | 8,998   | 0.718 | 0.241 | 1.613 | 1.926E-02 | -5.460E-03 | -5.490E-03 | 0.32 | -0.015 | 7   |
| 20  | Arabidopsis | 17  | 4,224 | 0.58     | 274   | 1,175   | 0.983 | 0.124 | 1.479 | 1.571E-02 | -4.636E-03 | -1.059E-02 | 0.23 | 0.017  | 7   |
| 21  | Arabidopsis | 16  | 4,224 | 0.45     | 673   | 4,088   | 0.834 | 0.201 | 1.756 | 9.039E-03 | 1.073E-02  | -5.219E-03 | 0.13 | -0.020 | 5   |
| 22  | Arabidopsis | 17  | 4,224 | 0.45     | 785   | 8,566   | 0.797 | 0.184 | 1.640 | 1.392E-02 | -3.139E-03 | -4.782E-03 | 0.26 | 0.046  | 6   |
| 23  | Arabidopsis | 17  | 4,224 | 0.47     | 784   | 3,067   | 0.917 | 0.079 | 1.538 | 4.996E-03 | 2.030E-03  | -3.555E-03 | 0.13 | 0.007  | 7   |
| 24  | Arabidopsis | 17  | 4,224 | 0.48     | 749   | 13,831  | 0.954 | 0.270 | 1.426 | 2.469E-02 | -1.971E-03 | -3.716E-03 | 0.13 | 0.022  | 7   |
| 25  | Arabidopsis | 17  | 4,224 | 0.64     | 276   | 1,212   | 0.846 | 0.145 | 1.360 | 1.597E-02 | -2.239E-03 | -8.128E-03 | 0.03 | 0.041  | 7   |
| 26  | Arabidopsis | 15  | 4,224 | 0.62     | 668   | 5,191   | 0.723 | 0.157 | 1.371 | 1.165E-02 | 1.359E-02  | -3.745E-03 | 0.24 | -0.031 | 5   |
| 27  | Arabidopsis | 21  | 4,224 | 0.50     | 853   | 35,655  | 0.999 | 0.190 | 0.526 | 4.906E-02 | 1.905E-03  | -1.170E-03 | 0.00 | 0.031  | 9   |
| 28  | Arabidopsis | 6   | 4,224 | 0.69     | 507   | 14,164  | 0.979 | 0.304 | 1.246 | 5.521E-02 | -5.848E-03 | -4.928E-03 | 0.26 | -0.028 | 7   |
| 29  | Arabidopsis | 9   | 4,224 | 0.66     | 395   | 3,312   | 0.963 | 0.162 | 1.193 | 2.128E-02 | -3.748E-03 | -4.378E-03 | 0.17 | 0.008  | 7   |
| 30  | Arabidopsis | 12  | 4,224 | 0.83     | 104   | 555     | 0.903 | 0.868 | 1.022 | 5.181E-02 | -1.293E-02 | -1.905E-02 | 0.03 | 0.085  | 2   |
| 31  | Arabidopsis | 8   | 4,224 | 0.67     | 512   | 6,190   | 0.979 | 0.208 | 1.062 | 2.366E-02 | -5.006E-03 | -4.487E-03 | 0.38 | 0.005  | 7   |
| 32  | Arabidopsis | 12  | 4,224 | 0.27     | 662   | 58,645  | 0.884 | 0.421 | 0.680 | 1.340E-01 | -1.614E-03 | -2.090E-03 | 0.35 | 0.038  | 9   |
| 33  | Arabidopsis | 6   | 4,224 | 0.86     | 389   | 4,768   | 0.887 | 0.427 | 1.052 | 3.159E-02 | 8.965E-03  | -4.397E-03 | 0.13 | 0.017  | 5   |
| 34  | Arabidopsis | 10  | 4,224 | 0.86     | 180   | 1,710   | 0.971 | 0.737 | 1.205 | 5.307E-02 | -3.986E-03 | -1.246E-02 | 0.01 | 0.006  | 2   |
| 35  | Arabidopsis | 8   | 4,224 | 0.58     | 670   | 3,807   | 0.799 | 0.689 | 2.190 | 8.493E-03 | -9.411E-03 | -8.692E-03 | 0.01 | 0.047  | 2   |
| 36  | Arabidopsis | 12  | 4,224 | 0.67     | 560   | 53,182  | 0.999 | 0.833 | 0.146 | 1.699E-01 | -2.763E-03 | -1.817E-03 | 0.00 | 0.009  | 9   |
| 37  | Arabidopsis | 3   | 4,224 | 0.67     | 738   | 9,251   | 0.791 | 0.855 | 1.814 | 1.701E-02 | -3.506E-03 | -4.176E-03 | 0.29 | -0.034 | 7   |
| 38  | Arabidopsis | 24  | 4,224 | 0.53     | 573   | 7,517   | 0.994 | 0.428 | 1.346 | 2.293E-02 | 1.846E-03  | -5.474E-03 | 0.17 | -0.021 | 7   |
| 39  | Arabidopsis | 10  | 4,224 | 0.52     | 551   | 969     | 0.728 | 0.250 | 2.888 | 3.197E-03 | -2.384E-02 | -1.700E-02 | 0.00 | -0.086 | 10  |
| 40  | Arabidopsis | 20  | 4,224 | 0.48     | 1,505 | 375,424 | 0.997 | 0.546 | 0.748 | 1.659E-01 | -8.301E-04 | -1.018E-03 | 0.55 | 0.011  | 4   |
| 41  | Rice        | 24  | 6,495 | 0.67     | 782   | 24,078  | 0.934 | 0.307 | 1.204 | 3.942E-02 | -2.849E-03 | -2.899E-03 | 0.35 | -0.020 | 7   |
| 42  | Rice        | 12  | 6,495 | 0.33     | 885   | 96,638  | 0.905 | 0.634 | 0.672 | 1.235E-01 | -1.334E-03 | -1.618E-03 | 0.79 | 0.030  | 1   |
| 43  | Rice        | 9   | 6,495 | 0.68     | 1,056 | 56,671  | 0.860 | 0.540 | 1.057 | 5.087E-02 | -1.125E-03 | -1.794E-03 | 0.47 | -0.039 | 1   |
| 44  | Rice        | 45  | 6,495 | 0.68     | 1,582 | 227,671 | 0.930 | 0.439 | 0.911 | 9.103E-02 | -1.067E-03 | -1.104E-03 | 0.59 | 0.032  | 1   |
| 45  | Rice        | 8   | 6,495 | 0.49     | 1,221 | 68,353  | 0.998 | 0.202 | 0.474 | 4.589E-02 | -9.863E-04 | -4.867E-04 | 0.00 | -0.019 | 9   |
| 46  | Rice        | 6   | 6,495 | 0.89     | 214   | 1,005   | 0.779 | 0.134 | 0.791 | 2.205E-02 | -1.164E-02 | -9.645E-03 | 0.17 | 0.026  | 7   |
| 47  | Rice        | 18  | 6,495 | 0.82     | 274   | 3,863   | 0.978 | 0.760 | 1.167 | 5.164E-02 | -1.088E-02 | -9.112E-03 | 0.01 | -0.010 | 2   |
| 48  | Rice        | 8   | 6,495 | 0.69     | 538   | 14,234  | 1.000 | 0.154 | 0.656 | 4.927E-02 | -3.406E-03 | -1.790E-03 | 0.00 | 0.046  | 9   |
| 49  | Soybean     | 6   | 2,771 | 0.52     | 966   | 10,196  | 0.542 | 0.242 | 1.399 | 1.094E-02 | 7.903E-04  | -9.901E-05 | 0.33 | -0.027 | 3   |
| 50  | Soybean     | 36  | 2,771 | 0.64     | 773   | 6,909   | 0.510 | 0.272 | 1.478 | 1.158E-02 | -2.151E-03 | -1.274E-03 | 0.38 | 0.027  | 3   |
| 51  | Soybean     | 36  | 2,771 | 0.68     | 142   | 924     | 0.727 | 0.356 | 0.946 | 4.615E-02 | -1.492E-02 | -1.098E-02 | 0.36 | 0.112  | 2   |
| 52  | Soybean     | 24  | 2,771 | 0.67     | 473   | 2,992   | 0.573 | 0.221 | 1.315 | 1.340E-02 | -3.717E-03 | -3.139E-03 | 0.23 | 0.032  | 3   |
| 53  | Soybean     | 27  | 2,771 | 0.42     | 440   | 3,883   | 0.660 | 0.305 | 1.406 | 2.010E-02 | -3.123E-03 | -5.712E-04 | 0.30 | -0.012 | 3   |
| 54  | Tomato      | 160 | 1,481 | 0.61     | 684   | 53,759  | 0.982 | 0.535 | 0.761 | 1.151E-01 | -2.334E-03 | -2.277E-03 | 0.19 | -0.016 | 9   |
| 55  | Tomato      | 8   | 1,481 | 0.65     | 894   | 98,969  | 0.847 | 0.670 | 0.731 | 1.240E-01 | -1.778E-03 | -1.705E-03 | 0.75 | -0.014 | 1   |
| 56  | Tomato      | 18  | 1,481 | 0.43     | 432   | 21,099  | 0.998 | 0.481 | 0.888 | 1.133E-01 | -4.068E-03 | -4.180E-03 | 0.00 | 0.033  | 9   |
| 57  | Cassava     | 7   | 747   | 0.93     | 363   | 1,649   | 0.481 | 0.118 | 1.036 | 1.255E-02 | -5.976E-03 | -6.321E-03 | 0.30 | 0.005  | 3   |
| 58  | Cassava     | 33  | 747   | 0.7      | 456   | 459     | 0.341 | 0.031 | 0.844 | 2.212E-03 | -1.078E-02 | -5.193E-03 | 0.00 | 0.024  | 3   |
| 59  | Cassava     | 54  | 747   | 0.42     | 261   | 403     | 0.007 | 0.316 | 1.975 | 5.939E-03 | -1.720E-02 | -1.537E-02 | 0.07 | 0.007  | 10  |

\* The S-GCNs are identified with the same dataset ids from table 1. The expression matrix dimensions are the number of samples (Sam) and number of genes (Gen). The similarity threshold selected is  $\tau^*$ . The variables in characterization matrix are: The number of nodes (Nod), the number of edges (Edg), the clustering coefficient (CC), the centralization (Cen), the heterogeneity or  $CV(k)$  (Het), the density (Den), the assortativity coefficient from GO (AsG), the assortativity coefficient from PFAM (AsP), the tolerance to attacks (Tol) and the correlation between node degree and presence of immunity domains (KI). The last column (Clus) identifies the clusters where S-GCNs were classified.
