# Supplementary material for: Construction and comparison of gene co-expression networks shows complex plant immune responses
Source: PubMed Central journal article supplement (PMC4194462; doi:10.7717/peerj.610), 2014-10-09
Supplement: peerj-02-610-s003.pdf [file peerj-02-610-s003.pdf]

**Table S2.** The characterization matrix for M-GCNs\*.

| Plant       | Nod   | Edg   | CC    | Cen   | Het  | Den       | AsG        | AsP        | Tol  | KI        |
|-------------|-------|-------|-------|-------|------|-----------|------------|------------|------|-----------|
| Arabidopsis | 1,563 | 4,489 | 0.023 | 0.199 | 2.86 | 1.839E-03 | -1.146E-03 | -8.658E-03 | 0.07 | 2.994E-02 |
| Rice        | 744   | 3,065 | 0.622 | 0.204 | 1.67 | 5.545E-03 | 2.798E-03  | 6.581E-03  | 0.11 | 1.773E-03 |
| Soybean     | 762   | 6,356 | 0.622 | 0.239 | 1.61 | 1.096E-02 | 1.797E-03  | 5.169E-03  | 0.29 | 2.539E-03 |
| Tomato      | 674   | 5,794 | 0.816 | 0.169 | 1.27 | 1.277E-02 | -3.813E-03 | -3.808E-03 | 0.29 | 2.792E-03 |
| Cassava     | 307   | 739   | 0.434 | 0.118 | 1.33 | 7.026E-04 | -3.727E-02 | -3.052E-02 | 0.01 | 1.183E-02 |

\*The list of variables: The number of nodes (Nod), the number of edges (Edg), the clustering coefficient (CC), the centralization (Cen), the heterogeneity or  $CV(k)$  (Het), the density (Den), the assortativity coefficient from GO (AsG), the assortativity coefficient from PFAM (AsP), the tolerance to attacks (Tol) and the correlation between node degree and presence of immunity domains (KI).
