# Supplementary material for: Construction and comparison of gene co-expression networks shows complex plant immune responses
Source: PubMed Central journal article supplement (PMC4194462; doi:10.7717/peerj.610), 2014-10-09
Supplement: peerj-02-610-s009.pdf [file peerj-02-610-s009.pdf]

## Supplemental\_Script\_S1

```
#####
# 1. GCN Construction #
#####

#####
# 1.1 Expression matrix #
#####

#Place the expression data in your working directory.
#In R, create the object "samples.names" listing your samples.
#e.g.: samples.names=c("GSM700349", "GSM700350", "GSM700351")

#Files *.CEL (Affymetrix) are preprocessed as follows:
library(affy)
#Read the data:
data=ReadAffy(filenamees = samples.names)
#Normalization:
esetCEL=rma(data)
#Expression matrix construction:
E=exprs(esetCEL)

#Files *.GPR (Axon GenePix):
library(marray)
#Read the data:
rg=read.GenePix(samples.names)
#Normalization:
nrg=maNorm(rg, norm="median")
#Expression matrix construction:
E=nrg@maA

#Files *.TXT (Agilent):
library(Agi4x44PreProcess)
#Read the data:
target=made.target(samples.names)
data=read.Agi44FE(target, makePLOT=FALSE)
#Normalization:
data.n=BGandNorm(data, BGmethod="norE", NORMmethod="quantile", foreground="MeanSignal",
background="BGMedianSignal", offset=50, makePLOTpre=FALSE, makePLOTpost=FALSE)
#Deletion of non-control probes
data.p=summarize.probe(data.n, makePLOT=FALSE, target)
#Expression matrix construction:
E=data.p$R

#####
#1.2 Similarity Matrix #
#####

#The similarity matrix is saved in files .bin and .des.
#Bigmatrix files:
library(bimemory)
n=nrow(E)
x=filebacked.big.matrix(n*(n-1)/2, 1, type="double",
backingfile="similaritypair.bin", descriptorfile="similaritypair.desc") #Port M
S=filebacked.big.matrix(n, n, type="double", backingfile="similarity.bin",
descriptorfile="similarity.desc")

#Select the number of processors for a parallel process:
library(doParallel)
Sys.getenv('NUMBER_OF_PROCESSORS')
cl <- makeCluster(5)
registerDoParallel(cl)

#Discretize the expression matrix:
```

Supplemental\_Script\_S1

```
Ed=discreteze(t(E), disc="global equal width", nbins=floor(1+log2(dim(E)[2])))
```

```
#Load the bigmatrix:
desc<-dget("similarity.desc")
x=attach.big.matrix(desc); flush(x)
```

```
#Function to calculate the Mutual information ("shrink" entropy estimator):
mi_modificada=function(X, Y, ensy){
  U <- cbind(Y, X)
  Hx <- .Call("entropyR", X, ensy, 1, 2, DUP = FALSE, PACKAGE = "infotheo")
  Hy <- .Call("entropyR", Y, ensy, 1, 2, DUP = FALSE, PACKAGE = "infotheo")
  Hyx <- .Call("entropyR", U, ensy, 2, 2, DUP = FALSE, PACKAGE = "infotheo")
  res <- Hx + Hy - Hyx
}

```

#The similarities between pairs of genes i and j are calculated as follows:

```
n=dim(Ed)[2]#Number of genes
ens=dim(Ed)[1]#Number of samples
k=1#Starting gene
paso=100#Step
while(k<n){
  print(k)
  if((k+paso)>n){paso=1}
  lista<-foreach(i=k:(k+paso), .export=c("mutinformation")) %dopar% {
    unlist(lapply((i+1):n, function(j) {mi_modificada(Ed[, i ], Ed[, j ], ens)}))
  }
  IM=unlist(lista)
  IM[which(IM<0)]<-0
  end=sum(seq(n-1, n-(k+paso)))
  start=sum(seq(n-1, n-k))-(n-(k+1))
  x[start:end, 1]<-sqrt(1-exp(-2*IM))
  flush(x)
  remove(lista)
  gc()
  k=k+paso
}

```

```
#Load the similarity matrix:
desc<-dget("similarity.desc")
S=attach.big.matrix(desc)
dim(S); flush(S)
```

```
#Fill the similarity matrix:
start=1
for(i in 1:(n-1)){
  end=start+(n-i-1)
  S[(i:n), i]<-c(1, x[(start:end), 1])
  start=end+1
  flush.console()
}
S[n, n]=1; flush(S)
```

```
#####
#1.3 Similarity threshold #
#####
```

```
#Create matrices to save:
#The local clustering coefficient Ci for each similarity threshold.
C=flebacked.big.matrix(n, 100, type="double", backingfile="ci.bin",
  descriptorfile="ci.desc")
#The number of neighbors of gene i or node degree (ki) for each similarity
threshold.
```

## Supplemental\_Script\_S1

```
K=filbacked.big.matrix(n, 100, type="double", backingfile="ki.bin",
desciptorfile="ki.desc")
```

```
#Similarity thresholds evaluated:
(ltaos=seq(0.99, 0.01, by=-0.01))
```

```
#Calculate the node degree and the local clustering coefficient as the similarity
threshold change:
```

```
for(tao in ltaos){
  print(tao)
  ##Adjacency matrix
  A=matrix(0, nrow=n, ncol=n)
  ##Fill the adjacency matrix (equation 1):
  for(i in 1:n){
    v.unos=mwhich(S, cols=i, vals=tao, comps='gt')
    v.ceros=(1:n)[((1:n)%i n%v.unos)==FALSE]
    A[v.unos, i]<-1
    A[v.ceros, i]<-0
  }
  ##Calculate the ki and Ci:
  Ag=graph.adjacency(A, mode="undirected")
  remove(A); gc()
  Cv=transitivity(Ag, type="local")#Local clustering coefficient
  Kv=degree(Ag, loops=FALSE)#Node degree
  desc<-dget("ki.desc"); K=attach.big.matrix(desc)
  desc<-dget("ci.desc"); C=attach.big.matrix(desc)
  K[, round(tao*100, 0)]<-Kv; C[, round(tao*100, 0)]<-Cv; flush(K); flush(C)
  remove(K); remove(C)
}
```

```
#Calculate the observed clustering coefficient (Cr) in the GCN the expected
clustering coefficient (Co)
```

```
desc<-dget("ki.desc"); K=attach.big.matrix(desc)
desc<-dget("ci.desc"); C=attach.big.matrix(desc)
Cr=Co=rep(0, 100); (ltaos=seq(0.01, 0.99, by=0.01))
for(i in round(ltaos*100, 0)){
  gn<-which(K[, i]>=1)
  kn=length(gn)#Number of genes in the network
  k1=1/kn*sum(K[gn, i])#Variable in equation 3
  k2=1/kn*sum(K[gn, i]^2)#Variable in equation 3
  Co[i]=((k2-k1)^2)/(kn*k1^3) #The expected clustering coefficient for a randomized
GCN
  if(kn==0){Co[i]=0}
  gn<-which(K[, i]>1)
  kn=length(gn)#Number of genes with ki>1
  Cr[i]=1/kn*sum(C[gn, i])#The observed clustering coefficient (equation 2)
  if(kn==0){Cr[i]=0}
}
```

```
#Find the first local maximum of the curve:
```

```
(ltaos=seq(0.01, 0.99, by=0.01))
dif=runmed(abs(Cr-Co), k=23, endrule="constant")[1:100]
plot(ltaos, abs(Cr-Co)[ltaos*100], t="l", xlab="Threshold", ylab="|C-Co|")
```

```
#Identify the maximum and click on it:
```

```
tao=identify(ltaos, abs(Cr-Co)[ltaos*100], n=1)/100
```

```
#####
#1.4 Adjacency matrix #
#####
```

```
#Create a bigmatrix file for the adjacency matrix:
```

```
A=filbacked.big.matrix(n, n, type="double", backingfile="ady.bin",
```

```

descri ptorfile="ady. desc")

#Fill the adjacency matrix:
for(k in 1:n){
  v.unos=mwhi ch(S, cols=k, vals=tao, comps='gt')
  v.ceros=(1:n)[((1:n)%i n%v.unos)==FALSE]
  A[v.unos, k]<-1
  A[v.ceros, k]<-0
  print(k)
}
flush(A)

#####
#2. GCNs Compari son #
#####

#####
#2.1 Characteri zati on #
#####

library(doParal lel); library(Kendal l); library(bi gmemory); library(i graph); library(robfi lter); library(mi net); library(ade4)

#Load the bi gmatrix files from secti on 1.3 and 1.4
desc<-dget("ki . desc"); K=attach. bi g. matri x(desc)
desc<-dget("ci . desc"); C=attach. bi g. matri x(desc)
desc<-dget("ady. desc", sep="")
A=attach. bi g. matri x(desc)
A=as. matri x(A)

#Delete non-connected nodes from adjacency matrix:
A=A[whi ch(K[, round(tao*100, 0)]>0), whi ch(K[, round(tao*100, 0)]>0)]
n=di m(A)[1]
Ag=graph. adj acency(A, mode="undi rected")

#Create an array to save the graph vari ables:
Zr=rep(NA, 10)

#--Number of nodes:
Zr[1]=length(whi ch(K[, round(tao*100, 0)]>0))

#--Number of edges:
Zr[2]=sum(K[, round(tao*100, 0)])/2

#--Cl usteri ng coeffi ci ent:
gn<-whi ch(K[, round(tao*100, 0)]>1)
kn=length(gn)
Cr=1/kn*sum(C[gn, round(tao*100, 0)])
i f(kn==0){Cr=0}
Zr[3]<-Cr

#--Heterogenei ty:
gn<-whi ch(K[, round(tao*100, 0)]>=1)
kn=length(gn)
k1=1/kn*sum(K[gn, round(tao*100, 0)])
k2=1/kn*sum(K[gn, round(tao*100, 0)]^2)
Zr[5]=sqrt(k2-k1^2)/k1

#--Densi ty:
Zr[6]=sum(A[upper. tri (A)])/(n*(n-1))

#--Central i zati on:
kmax=max(K[, round(tao*100, 0)])

```

```
Zr[4]=(n/(n-2))*(kmax/(n-1)-Zr[6])
```

```
##--Assortativity:
```

```
##You must load a file of functional annotations (ids.) with the following structure  
(3 columns):
```

```
#<gene> <go> <pfam>  
#AT5G47220 G05634 PF00847  
#AT1G71920 G09507 PF00155  
#AT5G23960 g0 PF01397  
#AT3G45248 G012505 0
```

```
#Use g0 and 0 for genes without GO and PFAM annotations, respectively.
```

```
##List the genes in your adjacency matrix:
```

```
namegen=rownames(E)  
namegen=namegen[which(K[, round(tao*100, 0)]>0)]
```

```
##The assortativity coefficient from the GO:
```

```
go=asortativitydad$go[match(namegen, asortativitydad$gene)]  
go[is.na(go)]<-"g0"  
maxcat=length(names(table(go)))  
for (i in 2:maxcat){  
  go[which(go==names(table(go))[i])]<-(i-1)  
}  
if(names(table(go))[maxcat]=="g0"){  
  nos=sum(go=="g0")  
  go[go=="g0"]<-seq(maxcat, (maxcat+nos-1))  
} else {go[go==names(table(go))[maxcat]]<-maxcat}  
go=as.integer(go)
```

```
Zr[7]<-assortativity.nominal(Ag, go)
```

```
##The assortativity coefficient from the PFAM:
```

```
pfam=asortativitydad$pfam[match(namegen, asortativitydad$gene)]  
pfam[is.na(pfam)]<-"0"  
maxcat=length(names(table(pfam)))  
for (i in 2:maxcat){  
  pfam[which(pfam==names(table(pfam))[i])]<-(i-1)  
}  
if(names(table(pfam))[1]=="0"){  
  nos=sum(pfam=="0")  
  pfam[pfam=="0"]<-seq(maxcat, (maxcat+nos-1))  
} else {pfam[pfam==names(table(pfam))[maxcat]]<-maxcat}  
pfam=as.integer(pfam)
```

```
Zr[8]<-assortativity.nominal(Ag, pfam)
```

```
##--The correlation between the node degree and the presence of immunity domains
```

```
##You must load a list of genes encoding proteins involved in immunity.
```

```
##Name the object "esen". e.g. esen=c("AT1G01560", "AT1G06460", "AT1G08720")
```

```
es=rep(0, length(namegen))
```

```
es[namegen%n%esen]<-1
```

```
Zr[9]=Kendall(K[which(K[, round(tao*100, 0)]>=1), round(tao*100, 0)], es)$tau[1]
```

```
##--The tolerance to attacks
```

```
n=dim(A)[1]
```

```
percentages=c(seq(0.01, 0.99, 0.01))#Fraction of nodes removed
```

```
avo=average.path.length(Ag, directed=FALSE, unconnected=TRUE)#The average path length  
orderfilter=n-rank(degree(Ag), ties.method="first") #Nodes with the highest degree  
that will be removed sequentially
```

Supplemental\_Script\_S1

```
avpath<-foreach(i =percentages, . export=c("graph. adjacency", "average. path. length"))
%doapar% {
  filter=which(orderfilter<round(i *n, 0))
  Ai =graph. adjacency(Ag[-filter, -filter], mode="directed")
  average. path. length(Ai, directed=FALSE, unconnected=TRUE)#The average path length
as a function of the fraction of nodes removed
}
avpath=c(avo, unlist(avpath))
avpath[is.na(avpath)]<-1
Zr[10]=c(0, percentages)[which(avpath==max(avpath))][1]#The critical fraction at
which the average path length is maximum
```

```
#####
#2.2 ACP #
#####
```

```
#Create a characterization matrix for all your GCNs. Name it "Z".
#Performs a principal component analysis:
library(adegenet); library(ade4)
pca=dudi.pca(as.data.frame(Z), scannf=TRUE)
```

```
#Plot correlation circles:
s.corcircle(pca$co)
add.scatter.eig(pca$eig, 3, 1, 2, posi="bottomright")
#Plot principal components:
xax=1; yax=2#PC1-PC2
plot(pca$li[, xax], pca$li[, yax], pch=19, ylab=paste("PC", yax), xlab=paste("PC", xax))
abline(v=0, lty=2, col="gray"); abline(h=0, lty=2, col="gray")
pointLabel(pca$li[, c(xax, yax)], label=as.character(seq(1, nrow(Z))), method="GA",
doPlot=TRUE, cex=0.5, col="black", font=2)
```

```
#Find clusters:
find.clusters(Z, choose.n.clust=TRUE, criterion="max", stat="BIC", n.pca=10,
max.n.clust=50)
```
