# Supplementary material for: Construction and comparison of gene co-expression networks shows complex plant immune responses
Source: PeerJ journal article supplement (doi:10.7717/peerj.610), 2014-10-09
Supplement: Supplemental_Table_S3.pdf [file Supplemental_Table_S3.pdf]

**Table S3.** The explained variance by each principal component (PC1, PC2, PC3). The correlation (PCC) between the graph variables and the network size (number of nodes in each S-GCN) is also shown.

| Variable                              | PCC   | Explained Variance (EV) (%) |      |      | Cumulated EV (%) |
|---------------------------------------|-------|-----------------------------|------|------|------------------|
|                                       |       | PC1                         | PC2  | PC3  |                  |
| Clustering Coefficient (CC)           | 0.22  | 48.5                        | 0.5  | 7.9  | 57               |
| Centralization (Cen)                  | 0.20  | 23.3                        | 41.6 | 0.7  | 66               |
| Heterogeneity (Het)                   | -0.12 | 64.5                        | 2.1  | 4.1  | 71               |
| Density (Den)                         | 0.32  | 66.6                        | 13.9 | 0.9  | 82               |
| Assortativity Coefficient: GO (AsG)   | 0.41  | 21.6                        | 46.7 | 1.0  | 69               |
| Assortativity Coefficient: PFAM (AsP) | 0.64  | 40.2                        | 40.5 | 0.1  | 81               |
| Immunity-Degree dependence (KI)       | 0.01  | 0.1                         | 4.2  | 59.8 | 64               |
| Tolerance to attacks (Tol)            | 0.18  | 1.9                         | 14.4 | 37.9 | 54               |
